# Supplementary material for: Conformational polymorphs of 1,1,2,2-tetrachloroethane: pressure vs. temperature
Source: Royal Society of Chemistry journal article supplement (doi:10.1039/c1cc10689a), 2011-01-01
Supplement: c1cc10689a.pdf [file c1cc10689a.pdf]

# Supplementary Information

## Conformational polymorphs of 1,1,2,2-tetrachloroethane: pressure vs. temperature

Maciej Bujak,<sup>\*,a</sup> Dieter Bläser,<sup>b</sup> Andrzej Katrusiak,<sup>\*,c</sup> and Roland Boese,<sup>\*,b</sup>

<sup>a</sup>Faculty of Chemistry, University of Opole, Oleska 48, 45-052 Opole, Poland, <sup>b</sup>Fachbereich Chemie der Universität Duisburg-Essen, Campus Essen, Universitätstrasse 7, D-45177 Essen, Germany, and <sup>c</sup>Faculty of Chemistry, Adam Mickiewicz University, Grunwaldzka 6, 60-780 Poznań, Poland

E-mail: mbujak@uni.opole.pl; katran@amu.edu.pl; roland.boese@uni-due.de

Commercially available 1,1,2,2-tetrachloroethane (pure, POCh, Poland) was used without further purification. The isobaric low-temperature crystallization was performed on the diffractometer at a temperature of 215 K with a miniature zone melting procedure using focused infrared-laser- radiation according to: Boese, R.; Nussbaumer, M. *In Situ Crystallization Techniques*, in: Organic Crystal Chemistry, Jones, D. W., Ed., Oxford University Press, Oxford, England, 1994, 20–37.

A single crystal of 1122TCE, for the high-pressure measurement, was grown *in-situ* in a modified Merrill-Bassett diamond-anvil cell, DAC [Merrill, L.; Bassett, W. A. *Rev. Sci. Instrum.* **1974**, *45*, 290–294; Bassett, W. A. *High Press. Res.*, **2009**, *29*, 163–186] in isochoric conditions (Fig. S1). A general experimental procedure for the high-pressure crystallization method was previously reported [R. Fourme, *J. Appl. Crystallogr.*, 1968, **1**, 23–30; W. L. Vos, L. W. Finger, R. J. Hemley and H. Mao, *Phys. Rev. Lett.*, 1993, **71**, 3150–3153; D. R. Allan, S. J. Clark, M. J. P. Brugmans, G. J. Ackland and W. L. Vos, *Phys. Rev. B, Condens. Mat.*, 1998, **58**, R11809–R11812; M. Bujak, A. Budzianowski and A. Katrusiak, *Z. Kristallogr.*, 2004, **63**, 573–579]. The ruby-fluorescence line shift measured with BETSA PRL spectrometer was used for measuring the pressure in the DAC [Barnett, J. D.; Block, S.; Piermarini, G. J. *Rev. Sci. Instrum.* **1973**, *44*, 1–9; Piermarini, G. J.; Block, S.; Barnett, J. D.; Forman, R. A. *J. Appl. Phys.* **1975**, *46*, 2774–2780] with the accuracy of *ca.* 0.05 GPa.

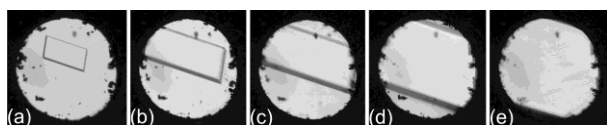

**Fig. S1.** The isochoric single-crystal growth stages (a → e) of 1122TCE in a diamond-anvil cell at 0.65 GPa. The pressure chamber is 0.48 mm in diameter and ruby chips for the pressure calibration are scattered close to the gasket edges.

The analysis of intermolecular interactions was performed with program CrystalExplorer [Wolff, S. K.; Grimwood, D. J.; McKinnon, J. J.; Jayatilaka, D.; Spackman, N. A. *CrystalExplorer* 2.0 (r 313). University of Western Australia, Perth, Australia, 2007; <http://hirshfeldsurface.net/CrystalExplorer/>; McKinnon, J. J.; Spackman, M. A.; Mitchell, A. S. *Acta Cryst.* **2004**, *B60*, 627–668].

The compressibility measurement, between ambient pressure and *ca.* 1 GPa, was performed in the cylinder-and-piston apparatus [Baranowski, B.; Moroz, A. *Polish J. Chem.* **1982**, *56*, 379–391]. The pressure was changed at the rate of *ca.* 0.02 GPa. The initial volume of the reaction chamber was 9.8 cm<sup>3</sup>.

**Table S1.** The 1122TCE crystal data and structure determination summary.

|                                                    | phase $\alpha$                                                 | phase $\beta$                                                     |
|----------------------------------------------------|----------------------------------------------------------------|-------------------------------------------------------------------|
| pressure                                           | 0.65(5) GPa                                                    | 0.1 MPa                                                           |
| temperature, K                                     | 295(2)                                                         | 215(1)                                                            |
| formula                                            | C <sub>2</sub> H <sub>2</sub> Cl <sub>4</sub>                  | C <sub>2</sub> H <sub>2</sub> Cl <sub>4</sub>                     |
| fw, g/mol                                          | 167.84                                                         | 167.84                                                            |
| crystal size, mm                                   | 0.48 x 0.48 x 0.22                                             | 0.3 x 0.3 x 0.3                                                   |
| crystal system                                     | monoclinic                                                     | orthorhombic                                                      |
| space group, <i>Z</i>                              | <i>P</i> 2 <sub>1</sub> / <i>c</i> , 2                         | <i>P</i> 2 <sub>1</sub> 2 <sub>1</sub> 2, 8                       |
| <i>a</i> , Å                                       | 6.1941(9)                                                      | 8.8687(19)                                                        |
| <i>b</i> , Å                                       | 6.186(2)                                                       | 10.501(2)                                                         |
| <i>c</i> , Å                                       | 7.361(3)                                                       | 12.835(3)                                                         |
| $\beta$ , °                                        | 104.90(2)                                                      | 90.0                                                              |
| <i>V</i> , Å <sup>3</sup>                          | 272.57(15)                                                     | 1195.3(4)                                                         |
| $\rho$ , g/cm <sup>3</sup>                         | 2.045                                                          | 1.865                                                             |
| $\mu$ , mm <sup>-1</sup>                           | 2.008                                                          | 1.831                                                             |
| $\theta$ range, °                                  | 3.40–25.34                                                     | 2.51–28.42                                                        |
| index ranges                                       | $-7 \leq h \leq 7$<br>$-5 \leq k \leq 5$<br>$-7 \leq l \leq 7$ | $-8 \leq h \leq 7$<br>$-8 \leq k \leq 14$<br>$-17 \leq l \leq 17$ |
| reflns collected                                   | 1157                                                           | 4746                                                              |
| <i>R</i> <sub>int</sub>                            | 0.1028                                                         | 0.0159                                                            |
| data [ <i>I</i> > 2σ( <i>I</i> )]                  | 191                                                            | 2243                                                              |
| data/parameters                                    | 198/31                                                         | 2372/111                                                          |
| GOF on <i>F</i> <sup>2</sup>                       | 1.174                                                          | 1.039                                                             |
| <i>R</i> <sub>1</sub> [ <i>I</i> > 2σ( <i>I</i> )] | 0.0598                                                         | 0.0273                                                            |
| <i>R</i> <sub>1</sub> (all data) <sup>a</sup>      | 0.0620                                                         | 0.0298                                                            |
| w <i>R</i> <sub>2</sub> (all data) <sup>a</sup>    | 0.1469                                                         | 0.0656                                                            |
| lrgst diff peak, e/Å <sup>3</sup>                  | 0.280                                                          | 0.386                                                             |
| lrgst diff hole, e/Å <sup>3</sup>                  | -0.245                                                         | -0.260                                                            |

<sup>a</sup> $R_1 = \sum |F_o| - |F_c| / \sum |F_o|$ ;  $wR_2 = \{ \sum [w(F_o^2 - F_c^2)^2] / \sum [w(F_o^2)^2] \}^{1/2}$ ;  $w = 1 / [\sigma^2(F_o^2) + (aP)^2 + bP]$ , where  $P = (F_o^2 + 2F_c^2) / 3$

**Table S2.** Molecular dimensions (Å, °) and intermolecular Cl...Cl distances (Å, °) for 1122TCE

| Pressure/Temperature(K)                     |                                           | 0.65(5) GPa/295(2) | 0.1 MPa/215(1)        |
|---------------------------------------------|-------------------------------------------|--------------------|-----------------------|
| C11–C1                                      | C11–C1/C13–C2                             | 1.751(11)          | 1.771(3)/1.774(3)     |
|                                             | C15–C3/C17–C4                             |                    | 1.775(3)/1.763(3)     |
| C1–C1 <sup>I</sup>                          | C1–C2/C3–C4                               | 1.531(17)          | 1.504(4)/1.508(4)     |
|                                             | C12–C1/C14–C2                             |                    | 1.777(3)/1.774(3)     |
| C12–C1                                      | C16–C3/C18–C4                             | 1.792(10)          | 1.780(3)/1.782(3)     |
|                                             |                                           |                    |                       |
| C11–C1–C12                                  | C11–C1–C12/C15–C3–C16                     | 110.0(6)           | 111.14(16)/111.12(15) |
|                                             | C13–C2–C14/C17–C4–C18                     |                    | 109.76(16)/110.23(17) |
| C11–C1–C1 <sup>I</sup>                      | C11–C1–C2/C15–C3–C4                       | 111.5(9)           | 109.02(19)/112.5(2)   |
|                                             | C13–C2–C1/C17–C4–C3                       |                    | 109.59(19)/112.8(2)   |
| C12–C1–C1 <sup>I</sup>                      | C12–C1–C2/C16–C3–C4                       | 108.2(9)           | 111.9(2)/108.88(19)   |
|                                             | C14–C2–C1/C18–C4–C3                       |                    | 112.8(2)/108.23(19)   |
| C11–C1–C1 <sup>I</sup> –C1 <sup>I</sup>     | C11–C1–C2–C13/C15–C3–C4–C17               | –180.0(5)          | –175.19(18)/–58.1(3)  |
| C11–C1–C1 <sup>I</sup> –C1 <sup>I</sup>     | C11–C1–C2–C14/C15–C3–C4–C18               | –58.9(8)           | 62.2(3)/64.2(3)       |
| C12–C1–C1 <sup>I</sup> –C1 <sup>I</sup>     | C12–C1–C2–C13/C16–C3–C4–C17               | 58.9(8)            | 61.5(3)/65.5(3)       |
| C12–C1–C1 <sup>I</sup> –C1 <sup>I</sup>     | C12–C1–C2–C14/C16–C3–C4–C18               | 180.0(5)           | –61.2(2)/–172.22(17)  |
| C11...C11 <sup>II</sup>                     | C11...C12 <sup>IV</sup>                   | 3.453(3)           | 3.434(2)              |
| C11...C11 <sup>II</sup> –C1 <sup>II</sup>   | C11...C12 <sup>IV</sup> –C1 <sup>IV</sup> | 123                | 174                   |
| C1–C11...C11 <sup>II</sup>                  | C1–C11...C12 <sup>IV</sup>                | 123                | 91                    |
| C11...C12 <sup>III</sup>                    | C13...C16 <sup>V</sup>                    | 3.453(3)           | 3.437(1)              |
| C11...C12 <sup>III</sup> –C1 <sup>III</sup> | C13...C16 <sup>V</sup> –C3 <sup>V</sup>   | 152                | 131                   |
| C1–C11...C12 <sup>III</sup>                 | C2–C13...C16 <sup>V</sup>                 | 111                | 144                   |

Symmetry codes: (<sup>I</sup>)  $-x+2, -y+1, -z+2$ ; (<sup>II</sup>)  $-x+2, -y, -z+2$ ; (<sup>III</sup>)  $-x+1, y-1/2, -z+3/2$ ; (<sup>IV</sup>)  $x-1/2, -y+1/2, -z$ ; (<sup>V</sup>)  $x+1/2, -y+1/2, -z+1$ .

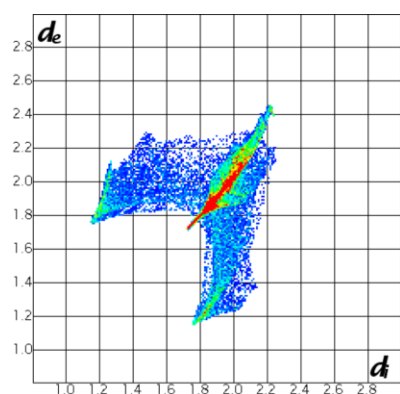

(a)

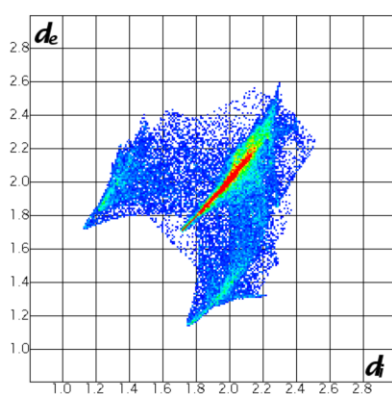

(b)

**Fig. S2** Two-dimensional fingerprint plots for the structures of 1122TCE at (a) 0.65 GPa/295 K, and (b) 215 K/0.1 MPa (note two crystallographically independent 1122TCE molecules).
